# Supplementary material
Source: PubMed Central journal article supplement (PMC7642090)
Supplement: AEM.01366-20-s0001.pdf [file AEM.01366-20-s0001.pdf]

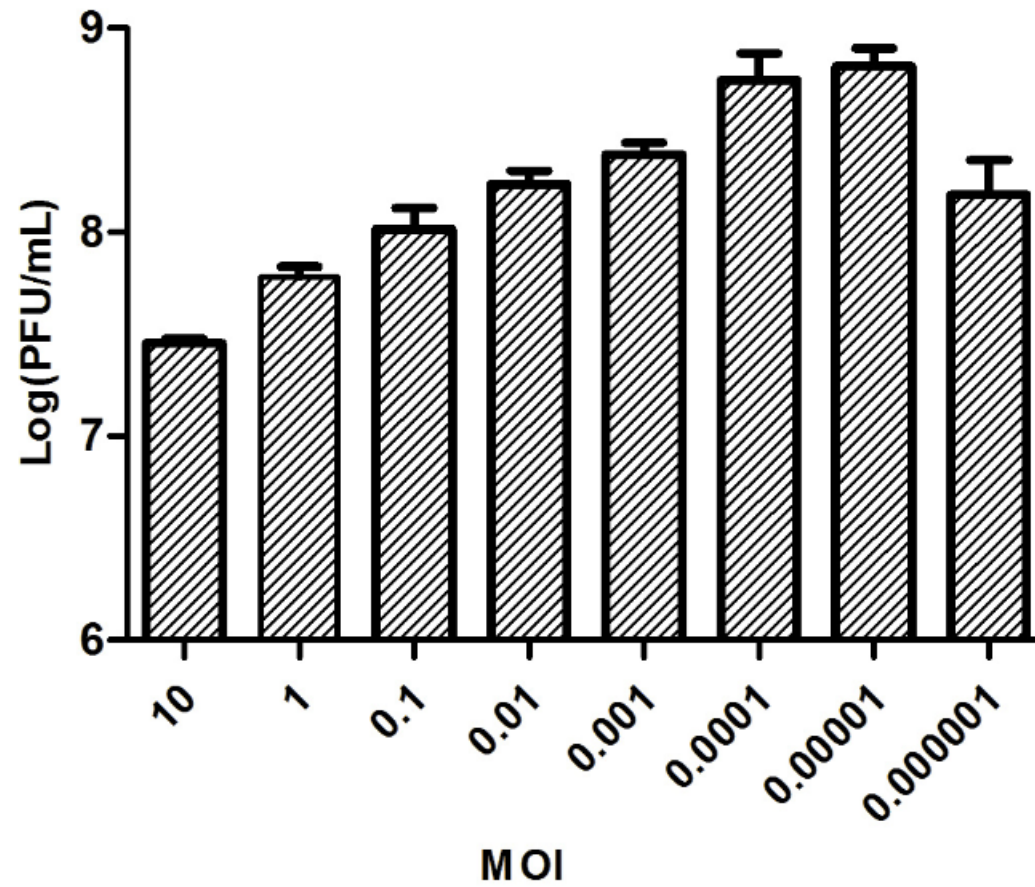

**Fig. S1** Titers of phage P<sub>1Z</sub> SAE-01E2 under different MOIs. The phage titers reached the highest peak at MOI of 0.00001.

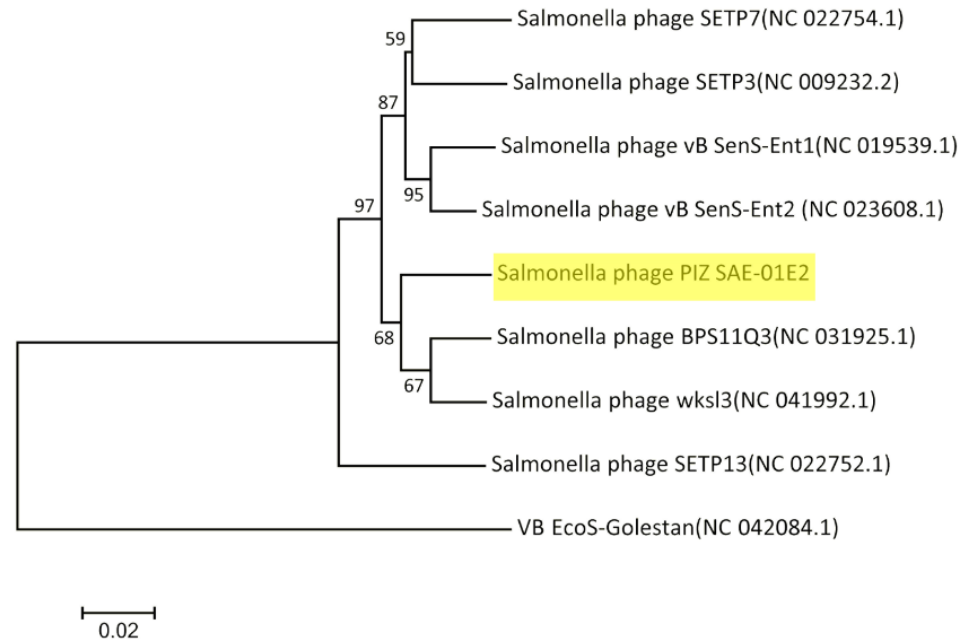

**Fig. S2 Phylogenetic tree based on the terminase large subunits.** Eight nucleotide sequences that shared a high similarity to the terminase large subunit of P<sub>IZ</sub> SAE-01E2 were selected by BLAST. A neighbor-joining phylogenetic tree was constructed with a bootstrap of 1000 using MEGA 7.0.26 after sequence alignment by ClustalW.

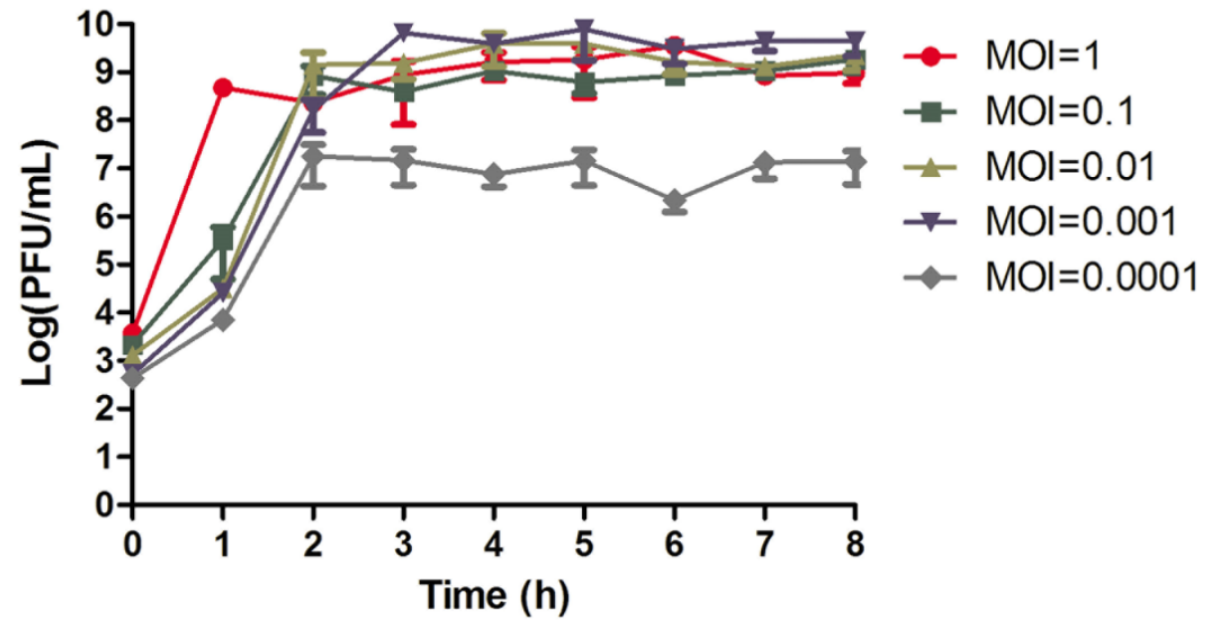

**Fig. S3** The growth curve of phage P<sub>1Z</sub> SAE-01E2 *in vitro*. *S. abortus equi* ATCC 9842 were cocultured with phage P<sub>1Z</sub> SAE-01E2 in LB medium at different MOIs. The phage titers were counted at the indicated time points by the double-layer agar plate method. The values represent means and SD (n = 3).

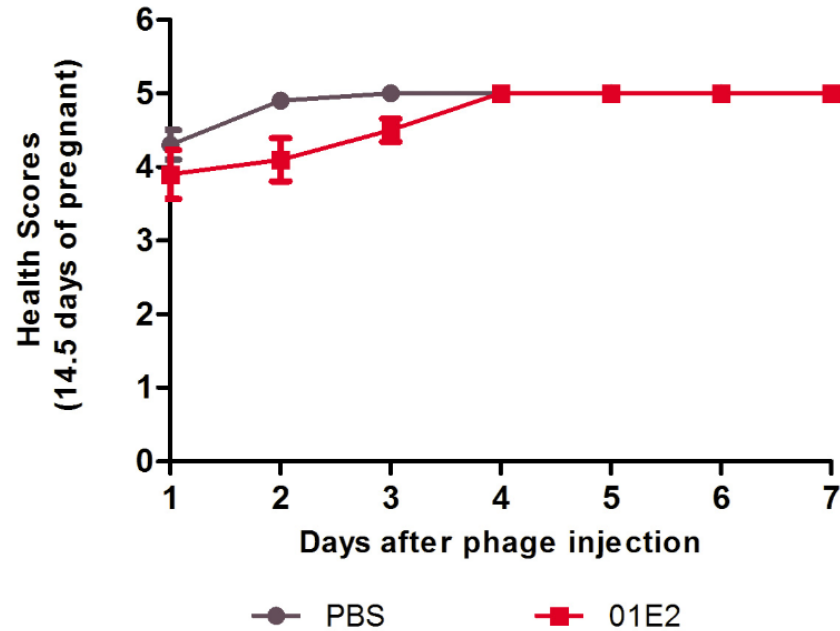

**Fig. S4 Health status of pregnant mice after phage P<sub>Iz</sub> SAE-01E2 (01E2) administration.** Mice on gestational day 14.5 were injected with 10<sup>9</sup> PFU/mouse of P<sub>Iz</sub> SAE-01E2 or PBS. The health status of mice was monitored and scored for six days. 0: dead; 1: near death; 2: exudative accumulation around partially closed eyes; 3: lethargy and hunched back; 4: decreased physical activity and ruffled fur; 5: normal health, condition unremarkable. The values represent the means and SD (n = 10).

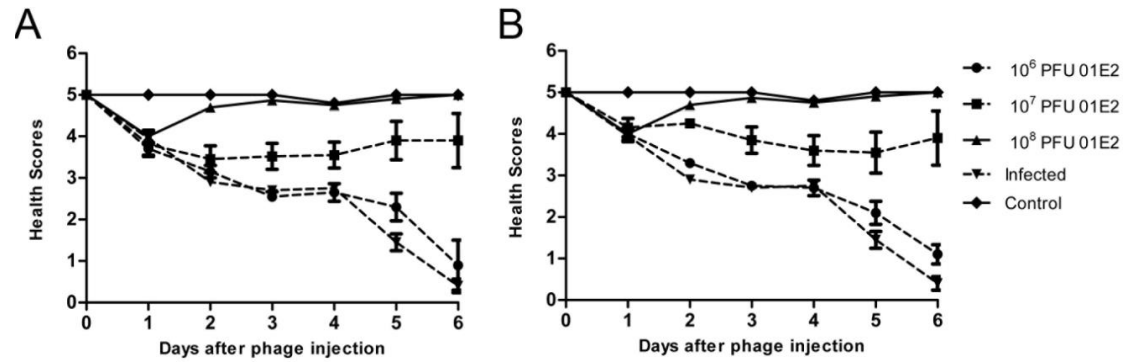

**Fig. S5 Health score of bacterial infection mice and phage P<sub>IZ</sub> SAE-01E2 (01E2) treated mice.** (A) Treatment with phage P<sub>IZ</sub> SAE-01E2 after 1 h of *S. abortus equi* ATCC 9842 infection. (B) Treatment with phage P<sub>IZ</sub> SAE-01E2 before 1 h of *S. abortus equi* ATCC 9842 infection. Mice were monitored until two days after giving birth.

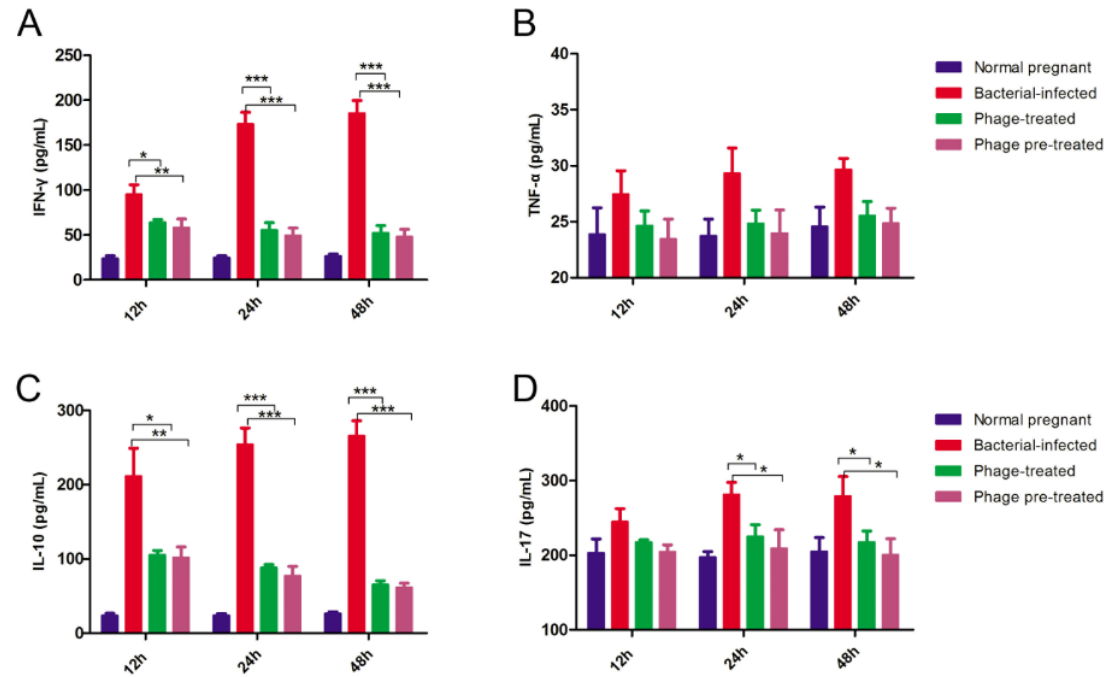

**Fig. S6 Inflammatory cytokine expression in the serum of bacterial infection mice and phage P<sub>IZ</sub> SAE-01E2 treated mice.** The levels of inflammatory cytokines IFN- $\gamma$ , TNF- $\alpha$ , IL-10, and anti-inflammatory cytokine IL-17 in the serum of the mice were determined at 12 h, 24 h and 48 h after *S. abortus equi* ATCC 9842 infection. The values represent the means and SD (n = 3). \*  $P < 0.05$ ; \*\*  $P < 0.01$ ; \*\*\*  $P < 0.001$ .

**Table S1. General features of the putative ORFs with the best matches in the database.**

| ORF <sup>a</sup> | Bp    |      | Amio acid | Size (kDa) | pI    | Annotated function              | Representative similarity to proteins in database | E value | Identity (positives) | Query cover | Accession no.  |
|------------------|-------|------|-----------|------------|-------|---------------------------------|---------------------------------------------------|---------|----------------------|-------------|----------------|
|                  | Start | Stop |           |            |       |                                 |                                                   |         |                      |             |                |
| 1§-              | 1537  | 1770 | 77        | 8.568      | 9.42  | uvvX-like protein               | [ <i>Salmonella</i> phage Ent1]                   | 3e-45   | 95%(97%)             | 100%        | YP_007010497.1 |
| 2†-              | 1767  | 1937 | 56        | 6.637      | 9.18  | DNA-binding protein             | [ <i>Gammaproteobacteria</i> ]                    | 3e-33   | 100%(100%)           | 100%        | WP_016047069.1 |
| 3†+              | 2532  | 2726 | 64        | 7.389      | 10.03 | hypothetical protein            | [ <i>Salmonella</i> phage S100]                   | 6e-36   | 95%(95%)             | 96%         | AXC39534.1     |
| 4†+              | 2930  | 3094 | 54        | 6.493      | 11.39 | hypothetical protein BPS11Q3_28 | [ <i>Salmonella</i> phage BPS11Q3]                | 8e-31   | 96%(98%)             | 100%        | YP_009322835.1 |
| 5†+              | 3158  | 3271 | 37        | 4.319      | 3.35  | hypothetical protein BPS11Q3_27 | [ <i>Salmonella</i> phage BPS11Q3]                | 8e-19   | 100%(100%)           | 100%        | YP_009322834.1 |
| 6†+              | 3264  | 3761 | 165       | 18.904     | 5.26  | hypothetical protein BPS11Q3_26 | [ <i>Salmonella</i> phage BPS11Q3]                | 5e-103  | 89%(90%)             | 99%         | YP_009322833.1 |
| 7†+              | 3758  | 3961 | 67        | 7.406      | 7.04  | hypothetical protein            | [ <i>Salmonella</i> phage SE2]                    | 1e-42   | 100%(100%)           | 100%        | YP_005098114.1 |
| 8†+              | 3964  | 4335 | 123       | 14.130     | 10.46 | hypothetical protein            | [ <i>Salmonella</i> phage SE2]                    | 4e-85   | 100%(100%)           | 100%        | YP_005098115.1 |
| 9†+              | 4341  | 4775 | 144       | 15.570     | 4.59  | hypothetical protein LPSE_00022 | [ <i>Salmonella</i> phage LPSE1]                  | 5e-100  | 99%(99%)             | 100%        | APU02983.1     |
| 10§+             | 4854  | 5135 | 93        | 10.293     | 7.85  | putative holin                  | [ <i>Salmonella</i> phage Jersey]                 | 1e-59   | 96%(100%)            | 95%         | YP_008239771.1 |

|                   |      |       |     |        |       |                                   |                                           |        |            |      |                |
|-------------------|------|-------|-----|--------|-------|-----------------------------------|-------------------------------------------|--------|------------|------|----------------|
| 11 <sup>†</sup> + | 5137 | 5427  | 96  | 10.707 | 9.98  | putative holin, class II          | [ <i>Salmonella</i> phage vB_SenS-Ent2]   | 4e-61  | 97%(98%)   | 98%  | YP_009009974.1 |
| 12 <sup>†</sup> + | 5405 | 5893  | 162 | 17.333 | 9.61  | lysozyme                          | [ <i>Salmonella</i> phage LPSE1]          | 1e-113 | 99%(98%)   | 100% | APU02985.1     |
| 13 <sup>†</sup> + | 6078 | 6263  | 61  | 6.861  | 6.32  | hypothetical protein STP03_039    | [ <i>Salmonella</i> phage STP03]          | 1e-34  | 92%(98%)   | 100% | APM00294.1     |
| 14 <sup>†</sup> + | 6260 | 6415  | 51  | 5.761  | 10.39 | hypothetical protein              | [ <i>Salmonella</i> phage SE2]            | 3e-29  | 100%(100%) | 100% | YP_005098120.1 |
| 15 <sup>†</sup> + | 6412 | 6594  | 59  | 6.961  | 5.68  | hypothetical protein              | [ <i>Salmonella</i> phage SE2]            | 1e-33  | 95%(98%)   | 100% | YP_005098121.1 |
| 16 <sup>†</sup> + | 6591 | 6740  | 49  | 5.898  | 8.16  | hypothetical protein]             | [ <i>Salmonella</i> phage vB_SpuS_Sp4 ]   | 2e-23  | 96%(95%)   | 100% | AWY03000.1     |
| 17 <sup>†</sup> + | 6737 | 6961  | 74  | 8.578  | 9.27  | hypothetical protein              | [ <i>Salmonella</i> enterica]             | 3e-474 | 100%(100%) | 100% | WP_015976715.1 |
| 18 <sup>‡</sup> + | 7141 | 7263  | 40  | 5.016  | 7.16  | putative membrane protein         | [ <i>Salmonella</i> phage vB_SenS_phi135] | 4e-14  | 84%(89%)   | 92%  | AST15499.1     |
| 19 <sup>†</sup> + | 7260 | 7442  | 60  | 6.858  | 8.68  | hypothetical protein              | [ <i>Salmonella</i> phage SE2]            | 2e-34  | 100%(100%) | 100% | YP_005098124.1 |
| 20 <sup>†</sup> + | 7503 | 7634  | 43  | 4.805  | 4.02  | hypothetical protein              | [ <i>Salmonella</i> phage SE2]            | 4e-23  | 100%(100%) | 100% | YP_005098125.1 |
| 21 <sup>†</sup> + | 7663 | 8169  | 168 | 18.820 | 6.18  | terminase small subunit           | [ <i>Salmonella</i> phage BPS11Q3]        | 3e-118 | 99%(98%)   | 100% | YP_009322818.1 |
| 22 <sup>§</sup> + | 8159 | 9430  | 423 | 47.640 | 6.20  | terminase large subunit           | [ <i>Salmonella</i> phage BPS11Q3]        | 0.0    | 99%(99%)   | 100% | YP_009322817.1 |
| 23 <sup>†</sup> + | 9443 | 10918 | 491 | 53.972 | 4.68  | DUF4055 domain-containing protein | [ <i>Salmonella</i> virus VSe103]         | 0.0    | 99%(99%)   | 99%  | AXQ70131.1     |



|                   |       |       |     |        |       |                                  |                                            |        |            |      |                |
|-------------------|-------|-------|-----|--------|-------|----------------------------------|--------------------------------------------|--------|------------|------|----------------|
| 24 <sup>†</sup> - | 10949 | 11599 | 216 | 24.966 | 5.75  | amidase                          | [ <i>Salmonella</i> phage SE2]             | 1e-153 | 95%(98%)   | 100% | YP_005098129.1 |
| 25 <sup>†</sup> + | 11765 | 12808 | 347 | 38.687 | 7.35  | head morphogenesis protein       | [ <i>Salmonella</i> phage FSL SP-101]      | 0.0    | 94%(96%)   | 100% | AGF87707.1     |
| 26 <sup>†</sup> + | 12811 | 13269 | 152 | 16.399 | 4.39  | putative head decoration protein | [ <i>Salmonella</i> phage Ent1]            | 3e-101 | 99%(100%)  | 100% | YP_007010459.1 |
| 27 <sup>§</sup> + | 13423 | 13542 | 39  | 4.653  | 10.98 | hypothetical protein             | [ <i>Salmonella</i> phage ST3]             | 3e-20  | 100%(100%) | 100% | ASZ77969.1     |
| 28 <sup>†</sup> + | 13587 | 13973 | 128 | 14.228 | 9.74  | o-spanin                         | [ <i>Salmonella</i> phage vB_SenS_PVP-SE2] | 3e-81  | 91%(96%)   | 100% | AST15489.1     |
| 29 <sup>†</sup> + | 13957 | 14082 | 41  | 4.764  | 4.36  | i-spanin                         | [ <i>Salmonella</i> phage vB_SenS_PVP-SE2] | 2e-20  | 98%(100%)  | 100% | AST15516.1     |
| 30 <sup>†</sup> + | 14167 | 14868 | 233 | 25.710 | 5.88  | putative scaffold protein        | [ <i>Salmonella</i> phage Ent1]            | 7e-163 | 98%(99%)   | 100% | YP_007010462.1 |
| 31 <sup>†</sup> + | 14872 | 15921 | 349 | 37.887 | 4.55  | capsid protein                   | [ <i>Salmonella</i> phage MA12]            | 0.0    | 99%(98%)   | 100% | YP_009280185.1 |
| 32 <sup>†</sup> + | 15982 | 16266 | 94  | 9.325  | 9.79  | head protein                     | [ <i>Salmonella</i> phage BPS11Q3]         | 4e-57  | 100%(100%) | 100% | YP_009322872.1 |
| 33 <sup>†</sup> + | 16278 | 16628 | 115 | 12.157 | 4.02  | hoc protein                      | [ <i>Salmonella</i> phage BPS11Q3]         | 2e-75  | 99%(99%)   | 100% | YP_009322871.1 |
| 34 <sup>†</sup> + | 16665 | 16853 | 62  | 7.088  | 4.69  | head-tail joining protein        | [ <i>Salmonella</i> phage STP03]           | 2e-35  | 98%(100%)  | 100% | APM00274.1     |
| 35 <sup>†</sup> + | 16857 | 17366 | 169 | 17.806 | 4.60  | head-tail joining protein        | [ <i>Salmonella</i> phage BPS11Q3]         | 2e-119 | 100%(100%) | 100% | YP_009322869.1 |
| 36 <sup>†</sup> + | 17369 | 17974 | 201 | 20.612 | 8.13  | neck protein                     | [ <i>Salmonella</i> phage BPS11Q3]         | 1e-139 | 99%(99%)   | 100% | YP_009322868.1 |

|                   |       |       |     |        |       |                                 |                                            |        |            |      |                |
|-------------------|-------|-------|-----|--------|-------|---------------------------------|--------------------------------------------|--------|------------|------|----------------|
| 37 <sup>†</sup> + | 17974 | 18333 | 119 | 13.085 | 9.23  | tail protein                    | [ <i>Salmonella</i> phage BPS11Q3]         | 4e-80  | 100%(100%) | 100% | YP_009322867.1 |
| 38 <sup>†</sup> + | 18330 | 18725 | 131 | 14.430 | 9.71  | tail protein                    | [ <i>Salmonella</i> phage BPS11Q3]         | 1e-90  | 98%(100%)  | 100% | YP_009322866.1 |
| 39 <sup>†</sup> + | 18725 | 19144 | 139 | 15.058 | 4.42  | phage tail protein              | [ <i>Salmonella</i> phage FSL SP-101]      | 3e-92  | 94%(95%)   | 100% | AGF87719.1     |
| 40 <sup>†</sup> + | 19144 | 20313 | 389 | 41.161 | 4.40  | putative tail protein           | [ <i>Salmonella</i> phage wksI3]           | 0.0    | 98%(99%)   | 100% | AFO12387.1     |
| 41 <sup>†</sup> - | 20342 | 21013 | 223 | 25.665 | 7.30  | tail protein                    | [ <i>Salmonella</i> enterica]              | 9e-162 | 99%(99%)   | 100% | WP_016062375.1 |
| 42 <sup>†</sup> - | 21126 | 21356 | 76  | 8.690  | 6.33  | DNA-binding protein             | [ <i>Salmonella</i> enterica]              | 7e-49  | 100%(100%) | 100% | WP_015984945.1 |
| 43 <sup>†</sup> - | 21353 | 22483 | 376 | 42.485 | 8.82  | oxidoreductase winged           | [ <i>Salmonella</i> enterica]              | 0.0    | 99%(99%)   | 100% | WP_064624764.1 |
| 44 <sup>†</sup> - | 22546 | 22725 | 59  | 6.603  | 9.63  | superinfection immunity protein | [ <i>Salmonella</i> enterica]              | 2e-32  | 100%(100%) | 100% | WP_015984947.1 |
| 45 <sup>†</sup> + | 22783 | 22905 | 40  | 4.417  | 10.22 | hypothetical protein phi135_35  | [ <i>Salmonella</i> phage vB_SenS_phi135]  | 4e-20  | 100%(100%) | 100% | AYP69716.1     |
| 46 <sup>†</sup> + | 22895 | 23311 | 138 | 15.877 | 5.24  | tail assembly chaperone         | [ <i>Salmonella</i> phage vB_SenS_PVP-SE2] | 5e-96  | 99%(99%)   | 100% | AST15484.1     |
| 47 <sup>‡</sup> + | 23317 | 23676 | 119 | 13.552 | 4.88  | hypothetical protein            | [ <i>Salmonella</i> enterica]              | 8e-84  | 100%(100%) | 100% | WP_015976751.1 |
| 48 <sup>†</sup> + | 23669 | 26002 | 777 | 83.004 | 4.66  | putative tape measure protein   | [ <i>Salmonella</i> phage LPSE1]           | 0.0    | 99%(99%)   | 100% | APU03018.1     |
| 49 <sup>†</sup> + | 26004 | 26504 | 166 | 18.638 | 4.72  | hypothetical protein            | [ <i>Salmonella</i> phage SETP13]          | 1e-121 | 100%(100%) | 100% | YP_008767027.1 |

|                   |       |       |      |         |      |                                               |                                         |        |            |      |                |
|-------------------|-------|-------|------|---------|------|-----------------------------------------------|-----------------------------------------|--------|------------|------|----------------|
| 50 <sup>‡</sup> + | 26501 | 27016 | 171  | 19.225  | 4.29 | DUF1833 domain-containing protein             | [ <i>Salmonella</i> enterica]           | 2e-122 | 99%(100%)  | 100% | WP_015976748.1 |
| 51 <sup>†</sup> + | 27013 | 27378 | 121  | 13.911  | 6.60 | hypothetical protein                          | [ <i>Salmonella</i> phage vB_SpuS_Sp4]  | 5e-86  | 99%(100%)  | 100% | AWY03032.1     |
| 52 <sup>‡</sup> + | 27369 | 29927 | 852  | 93.928  | 5.16 | tail fiber protein                            | [ <i>Salmonella</i> phage vB_SpuS_Sp4]  | 0.0    | 99%(99%)   | 100% | AWY03031.1     |
| 53 <sup>†</sup> + | 29940 | 31994 | 684  | 73.052  | 5.14 | tail spike protein                            | [ <i>Salmonella</i> phage BPS11Q3]      | 0.0    | 99%(99%)   | 100% | YP_009322852.1 |
| 54 <sup>†</sup> - | 32024 | 32116 | 30   | 3.069   | 9.00 | hypothetical protein                          | [ <i>Salmonella</i> phage SG2]          | 3e-23  | 100%(100%) | 100% | ASZ76550.1     |
| 55 <sup>†</sup> - | 32113 | 32334 | 73   | 8.722   | 4.75 | hypothetical protein                          | [ <i>Salmonella</i> phage SS3e]         | 6e-42  | 100%(100%) | 100% | YP_224070.1    |
| 56 <sup>†</sup> - | 32331 | 34796 | 821  | 92.394  | 8.38 | putative intein containing helicase precursor | [ <i>Salmonella</i> phage vB_SenS-Ent2] | 0.0    | 97%(98%)   | 100% | YP_009009958.1 |
| 57 <sup>†</sup> - | 34793 | 35290 | 165  | 18.769  | 9.79 | HNH endonuclease                              | [ <i>Salmonella</i> phage STP03]        | 4e-117 | 98%(99%)   | 100% | APM00325.1     |
| 58 <sup>†</sup> - | 35292 | 35483 | 63   | 7.084   | 8.54 | hypothetical protein                          | [ <i>Salmonella</i> phage vB_SpuS_Sp4]  | 8e-37  | 100%(100%) | 100% | AWY03027.1     |
| 59 <sup>†</sup> - | 35515 | 35802 | 95   | 10.808  | 9.77 | putative restriction endonuclease             | [ <i>Salmonella</i> phage LPSE1]        | 1e-60  | 96%(98%)   | 100% | APU03027.1     |
| 60 <sup>†</sup> - | 35889 | 38987 | 1032 | 116.136 | 7.29 | intein-containing DNA polymerase precursor    | [ <i>Salmonella</i> phage BPS11Q3]      | 0.0    | 99%(99%)   | 100% | YP_009322845.1 |

|       |       |       |     |        |       |                                      |                                    |        |            |      |                |
|-------|-------|-------|-----|--------|-------|--------------------------------------|------------------------------------|--------|------------|------|----------------|
| 61 †- | 39045 | 39671 | 208 | 23.471 | 4.94  | DNA polymerase                       | [ <i>Salmonella</i> phage BPS11Q3] | 1e-151 | 99%(100%)  | 100% | YP_009322844.1 |
| 62 †- | 39753 | 39929 | 58  | 6.937  | 10.32 | hypothetical protein                 | [ <i>Salmonella</i> phage MA12]    | 1e-33  | 100%(100%) | 100% | YP_009280156.1 |
| 63 †- | 39926 | 41353 | 475 | 53.348 | 6.77  | DUF2800 domain-containing protein    | [ <i>Salmonella</i> enterica]      | 0.0    | 94%(97%)   | 99%  | WP_109251281.1 |
| 64 †- | 41395 | 41907 | 170 | 19.245 | 4.45  | 13.88 kDa late protein               | [ <i>Salmonella</i> phage SETP7]   | 2e-98  | 91%(94%)   | 100% | YP_008767212.1 |
| 65 †+ | 42041 | 42259 | 72  | 7.920  | 8.57  | XRE family transcriptional regulator | [ <i>Salmonella</i> enterica]      | 1e-45  | 100%(100%) | 100% | WP_015984911.1 |

<sup>a</sup> †, AUG start codons; ‡, UUG start codons; §, GUG start codons; \*, CUU. +, right orientation; -, left orientation.

**Table S2. Average fetal weight and FGR analysis of different dose of phage P<sub>IZ</sub> SAE-01E2 treated mice.**

| Fetal growth     | Control                              | Phage P <sub>IZ</sub> SAE-01E2 |                                     |                                      |                           |                                     |                                       |
|------------------|--------------------------------------|--------------------------------|-------------------------------------|--------------------------------------|---------------------------|-------------------------------------|---------------------------------------|
|                  |                                      | 10 <sup>6</sup> PFU/mouse      | 10 <sup>7</sup> PFU/mouse           | 10 <sup>8</sup> PFU/mouse            | 10 <sup>6</sup> PFU/mouse | 10 <sup>7</sup> PFU/mouse           | 10 <sup>8</sup> PFU/mouse             |
|                  |                                      | treated                        | treated                             | treated                              | pre-treated               | pre-treated                         | pre-treated                           |
| FGR <sup>a</sup> | 1.072±0.053<br>(8/107) <sup>c</sup>  | -                              | 1.054±0.044<br>(15/38) <sup>c</sup> | 1.046±0.052<br>(15/110) <sup>c</sup> | -                         | 1.061±0.025<br>(10/48) <sup>c</sup> | 1.074±0.022<br>(10/115) <sup>c</sup>  |
| NFW <sup>b</sup> | 1.630±0.078<br>(99/107) <sup>c</sup> | -                              | 1.602±0.087<br>(23/38) <sup>c</sup> | 1.566±0.042<br>(95/110) <sup>c</sup> | -                         | 1.572±0.092<br>(38/48) <sup>c</sup> | 1.602±0.087<br>(105/115) <sup>c</sup> |

Eighty mice on gestational days 14.5 received a 10<sup>6</sup> PFU/mouse, 10<sup>7</sup> PFU/mouse, or 10<sup>8</sup> PFU/mouse of P<sub>IZ</sub> SAE-01E2 or PBS. The fetuses were weighted and fetal growth restriction was evaluated as described in the materials and methods. “-” represents the mice miscarried. <sup>a</sup> FGR, fetal growth restriction; <sup>b</sup> NFW, normal fetal weight; <sup>c</sup> the proportion of FGR or NFW in all fetuses.
